# Supplementary material
Source: PubMed Central journal article supplement (PMC4793609)
Supplement: sunv015994.wt1_default.pdf [file sunv015994.wt1_default.pdf]

**Supplementary Table 1. Primary outcome: total daily infant cry/fuss time through study period and at 6 months**

| (mins/day)               | Day /<br>Month | Mean ± SD |           |    |           | *Adjusted mean<br>difference<br><br>(95% CI) | p            | Median (IQR)           |                        | § p         |
|--------------------------|----------------|-----------|-----------|----|-----------|----------------------------------------------|--------------|------------------------|------------------------|-------------|
|                          |                | n         | Probiotic | n  | Placebo   |                                              |              | Probiotic              | Placebo                |             |
| Total cry /<br>fuss time | 0              | 75        | 328 ± 152 | 65 | 329 ± 126 |                                              |              | 322 (220 to 430)       | 350 (225 to 409)       |             |
|                          | 7              | 72        | 264 ± 128 | 61 | 261 ± 104 | 9 (-26 to 44)                                | 0.60         | 239 (167 to 359)       | 268 (174 to 335)       | 0.75        |
|                          | 14             | 65        | 256 ± 137 | 55 | 238 ± 111 | 26 (-15 to 67)                               | 0.21         | 231 (148 to 343)       | 245 (139 to 320)       | 0.59        |
|                          | 21             | 63        | 217 ± 130 | 55 | 207 ± 93  | 21 (-16 to 57)                               | 0.26         | 188 (140 to 293)       | 195 (143 to 268)       | 0.98        |
|                          | 1 <sup>∞</sup> | 67        | 229 ± 137 | 60 | 191 ± 103 | <b>49 (8 to 90)</b>                          | <b>0.02</b>  | 203 (130 to 295)       | 166 (128 to 265)       | 0.14        |
|                          | 6 <sup>∞</sup> | 65        | 122 ± 117 | 58 | 131 ± 111 | -7 (-47 to 34)                               | 0.75         | 85 (55 to 140)         | 105 (60 to 160)        | 0.27        |
| Fuss time                | 0              | 75        | 153 ± 107 | 65 | 163 ± 94  |                                              |              | 123 (71 to 205)        | 165 (103 to 223)       |             |
|                          | 7              | 72        | 143 ± 79  | 61 | 120 ± 67  | <b>31 (6 to 56)</b>                          | <b>0.02</b>  | 137 (93 to 190)        | 103 (66 to 158)        | 0.90        |
|                          | 14             | 65        | 144 ± 84  | 55 | 120 ± 65  | <b>32 (6 to 59)</b>                          | <b>0.02</b>  | 138 (83 to 201)        | 103 (75 to 158)        | 0.12        |
|                          | 21             | 63        | 126 ± 69  | 55 | 109 ± 66  | <b>26 (2 to 50)</b>                          | <b>0.03</b>  | 106 (75 to 170)        | 105 (68 to 155)        | 0.25        |
|                          | 1 <sup>∞</sup> | 67        | 153 ± 109 | 60 | 112 ± 78  | <b>52 (19 to 84)</b>                         | <b>0.002</b> | <b>125 (75 to 210)</b> | <b>106 (51 to 150)</b> | <b>0.04</b> |
|                          | 6 <sup>∞</sup> | 65        | 84 ± 77   | 58 | 84 ± 83   | 0 (-29 to 29)                                | 0.99         | 63 (30 to 100)         | 61 (35 to 105)         | 0.94        |
| Cry time                 | 0              | 75        | 175 ± 115 | 65 | 166 ± 93  |                                              |              | 176 (81 to 245)        | 160 (100 to 234)       |             |
|                          | 7              | 72        | 121 ± 95  | 61 | 142 ± 76  | -23 (-49 to 3)                               | 0.08         | <b>105 (58 to 160)</b> | <b>128 (84 to 188)</b> | <b>0.03</b> |
|                          | 14             | 65        | 112 ± 95  | 55 | 119 ± 86  | -8 (-39 to 24)                               | 0.63         | 88 (45 to 145)         | 103 (51 to 165)        | 0.47        |
|                          | 21             | 63        | 91 ± 92   | 55 | 98 ± 73   | -8 (-34 to 17)                               | 0.52         | 70 (23 to 120)         | 88 (37 to 145)         | 0.27        |
|                          | 1 <sup>∞</sup> | 67        | 76 ± 82   | 60 | 79 ± 77   | -2 (-28 to 24)                               | 0.86         | 56 (13 to 105)         | 63 (30 to 100)         | 0.40        |
|                          | 6 <sup>∞</sup> | 65        | 38 ± 56   | 58 | 47 ± 52   | -7 (-27 to 13)                               | 0.49         | 18 (0 to 45)           | 29 (10 to 75)          | 0.13        |

\*Adjusted for gender, age, delivery mode, feeding type, family history of atopy and baseline cry-fuss / fuss / cry time

§ Two-sample Wilcoxon rank-sum test
